# Supplementary material
Source: PubMed Central journal article supplement (PMC2423181)
Supplement: supp_28_10_3548__1.pdf [file supp_28_10_3548__1.pdf]

## Supplementary Materials and Methods

**TABLE S1. RT-PCR primers and their target introns**

| Ensembl <sup>a</sup> | Transcript Name | Intron #        | Intron Type | Primer  | Sequence (5'-3')          |
|----------------------|-----------------|-----------------|-------------|---------|---------------------------|
| 158302               | ACTB            | 4 <sup>b</sup>  | U2          | Forward | AGAGCTACGAGCTGCCTGAC      |
|                      |                 |                 |             | Reverse | AGCACTGTGTTGGCGTACAG      |
|                      |                 | 5 <sup>b</sup>  | U2          | Forward | GCAAAGACCTGTACGCCAAC      |
|                      |                 |                 |             | Reverse | AGTACTTGGCGCTCAGGAGGA     |
| 312515               | Drap1           | 2 <sup>b</sup>  | U12         | Forward | ACGAAGAGATTGGGAAGGTG      |
|                      |                 |                 |             | Reverse | GGGATGTGGTCATGGTCTTC      |
|                      |                 | 4 <sup>b</sup>  | U2          | Forward | GAAGGACCTGGTGGCATCT       |
|                      |                 |                 |             | Reverse | GGACAGCTTCTTGTCTTGC       |
| 229239               | GADPH           | 5 <sup>b</sup>  | U2          | Forward | CGAGATCCCTCCAAAATCAA      |
|                      |                 |                 |             | Reverse | TTCACACCCATGACGAACAT      |
|                      |                 | 8 <sup>b</sup>  | U2          | Forward | CGACCACTTTGTCAAGCTCA      |
|                      |                 |                 |             | Reverse | TTCCTCTGTGCTCTTGCTG       |
| 215659               | Mapk12          | 8 <sup>b</sup>  | U12         | Forward | CTGGTCTGTGGGCTGCAT        |
|                      |                 |                 |             | Reverse | CAGCCGCTGCACAAACTC        |
|                      |                 | 10 <sup>b</sup> | U2          | Forward | GCCTCTATCCTGACCAATGC      |
|                      |                 |                 |             | Reverse | CAACGTCGTCAAAGGAGTCA      |
| 241041               | Pex16           | 7 <sup>b</sup>  | U12         | Forward | AGCATCACGAGGAGCTGAGT      |
|                      |                 |                 |             | Reverse | CAGGGTTTCCACGACCTCT       |
|                      |                 | 6 <sup>b</sup>  | U2          | Forward | AGCAGTCCTACGTGGGGAAG      |
|                      |                 |                 |             | Reverse | ACTCAGCTCCTCGTGATGC       |
| 315985               | PPP2R2A         | 6 <sup>c</sup>  | U12         | Forward | GAAAGAGGAGGATGGAAGGT      |
|                      |                 |                 |             | Reverse | TGACCTGTTACTGGGATCTT      |
| 157812               | Psmc4           | 9 <sup>b</sup>  | U12         | Forward | CCGCCAGAAGAGATTGATTT      |
|                      |                 |                 |             | Reverse | TCCTGACAGATGGAGTTAATATCAG |
|                      |                 | 7 <sup>b</sup>  | U2          | Forward | CATGGTCCGGGATGTGTT        |
|                      |                 |                 |             | Reverse | CATCTGATTCAGCAGCTCCA      |
| 358933               | RCD8            | 5 <sup>b</sup>  | U12         | Forward | AGTGTGGCTGATCTGGCTTT      |
|                      |                 |                 |             | Reverse | GATGATCCTGCGAAAGTGGT      |
| 344855               | Vps16           | 9 <sup>b</sup>  | U12         | Forward | GTCCTCGTAGCAAGGAGAGG      |
|                      |                 |                 |             | Reverse | TCAGGCACCAGGTAGGAGTC      |
|                      |                 | 6 <sup>b</sup>  | U2          | Forward | GGGCCTGACCTTTACCTCTT      |
|                      |                 |                 |             | Reverse | CCCATCCAGATGTAGCCTGT      |
|                      |                 | 13 <sup>b</sup> | U12         | Forward | TCGGAAAGTGTTCCTGGAC       |
|                      |                 |                 |             | Reverse | AGCACCTGGATGGTGAGC        |

<sup>a</sup> Designates the transcript and is preceded in all cases by ENST00000, and refers to Ensembl release 36.

<sup>b</sup>. The primers are specific to exons flanking the indicated intron. <sup>c</sup> The primers are specific to exons 5 and 8



Human 170 EETKKKRSDSQIIENDSDLFVDLAAKVNQDNSRKS PKSYLEILAE VRDYKRRRQSYRAKN  
 Mouse 170 EETKKKRSAPQVIENDSDLFVDLAAKVNQDNSRKS PKSYLEILAE VRDYKRRRQSYRAKN  
 Rat 170 EETKKKRSAPQVIENDSDLFVDLAAKVNQDNSRKS PKSYLEILAE VRDYKRRRQSYRAKN  
 Dog 167 EETKKKRSDSQIIENDSDLFVDLAAKVNQDNSRKS PKSYLEILAE VRDYKRRRQSYRAKN  
 Frog 157 EQTKIQK-PSLTDRSEADLFEDLAAKVNQDDQKGPKSHLEIMAE MRDYKRRRQSYRAKN  
 Zebrafish 163 YEASQO--SAKRESNNE DLYVDLVAKIKKEV NQSGPKSHLEVLAEMRDYKRRRQSYRAKN  
 Fugu 169 GALNPR-S-EAPESSGQD DLYVDVSKLQRGEEQNEPKTHLELMAEMRDYKRRRQSYRAKN  
 Sea Urchin 157 EKSEGO---SQADKLDL ELTFD-PEKKNDDKKEITQTTHAEALAE MRDYKRRRQSYRAKN  
 Honey bee 153 ANTIK---PDIGHDIID--IQKQNSDKEDKEDKKLSFLEVLIQERNLKRRRAKH--RG  
 Flour beetle 150 QNTEG---PPSPPE---FTTLYDKKHDEEK---PLTYEEILAQERD SKRRRAKY--KS  
 consensus 181 ..... ..\*.....\*

Human 230 VHITKKSYTEVIRDVINVHMEELSNHWQEEQ-EKAE DAE-----KNEE R-----RSA  
 Mouse 230 VHITKKSYTEVIRDVIKVHMEELSSHWQEEQ-GRAGDAE-----KNEE R-----RSA  
 Rat 230 VHITKKSYTEVIRDVIKVHMEELSNHWQEEQ-ERAEDGAE-----KNEE R-----RSA  
 Dog 227 VHITKKSYTEVIRDVINVHMEELSSHWQEEQ-ERAEDGAE-----KDEE R-----RSA  
 Frog 216 VHITKKSYTEIIRDVINVHMEELNGHWRFDEI-NDDAGSSV-----SSSSVRRHTQ--RSP  
 Zebrafish 221 VHITKKSYTEVIREVIDVHSGELGRIVQWQAK-EESQVSO-----QSSH-RAESEKGRSA  
 Fugu 228 VHITKKSYTEVIREVINVHSEELGROWREE---EQEKVE-----EET R-----LKV  
 Sea Urchin 213 VHITKRSKTDVMREIIESHMKFL EETQSPVK-EEEEKPT-----PDQE R-----LAP  
 Honey bee 205 VHTNKKSHTEILREVIHQOMQLYIEYITDTHTNHTTETV-----TSTE-IQNSDINNHV  
 Flour beetle 197 VHINRKNHTEVIREVINGOMGEY-KEWLLAK-DQTKDNKECNNGVHDK-KEEIE--RPH  
 consensus 241 \*\*.....\*.....\*

Human 277 SVDSR-----QSGGS-YLDA--E-CSRHRDR-SRSP-HKRKRNK--DKDKNCE SRRRKE  
 Mouse 277 SVDSR-----QSGGS-YLDV--E-SSRHRAR-SRSP-HKRKRNK--DKSS--ESRRRKE  
 Rat 277 SVDSR-----QSGGS-YLDV--E-SSRHRAR-SRSP-HKRKRNK--DKSS--DSRRRKE  
 Dog 274 SVDSR-----QSGGS-YLDT--E-YSRHRKDR-SRSP-HKRKRNK--DKDKNWD SRRRKE  
 Frog 268 SADS K-----NS-GS-HRDK--Q-YSDRKRER-SRSP--RRHSNR--EKEK--DTKKKKE  
 Zebrafish 274 SVESR-----ASRIS-SRDE--H-EHRHRKR-SRSP--SRKHSR--EKKK--RS--RRDS  
 Fugu 271 SSHRR-----RSSSS--ES-G-HSHSRHH-SR---ERSHGR--ESKK--RRERNS  
 Sea Urchin 260 PEIIR-----GI-TLDV--D---DHGAG-IKAV--EETMTE--VAAH--HVAGMAN  
 Honey bee 259 NIQNSDLLIDEFSEK-YHDKYHDVFTKDLKDHYGNNSRNDKNDRYFEKSH--ISHTKNS  
 Flour beetle 252 SSTSR-----NSSSSSRSTNR--K-YDRHRDER-DRRA-KTGIVKK--GEIE--EIAQGKE  
 consensus 301 ..... ..\*.....\*

Human 324 R--DGERHH-----  
 Mouse 322 R--DGERHH-----  
 Rat 322 RRVDGERHH-----  
 Dog 321 R--DGRHH-----  
 Frog 311 R--DEDRHH-----  
 Zebrafish 317 H--SPDVER-----  
 Fugu 311 R--SPEDCRH-----  
 Sea Urchin 298 H--AVTNIV-----  
 Honey bee 316 K--ETETYSR-TNELHKAQKSYKLLRKETTKTC  
 Flour beetle 298 D--AHENEIGDIQGTVEVD-----  
 consensus 361 . . . . .

Supplementary Figure S1. (Continued)
